# Supplementary material
Source: PubMed Central journal article supplement (PMC2782352)
Supplement: nn9010494_si_001.pdf [file nn9010494_si_001.pdf]

Supporting Information to

# Understanding the electronic structure of metal/SAM/organic-semiconductor heterojunctions

*Ferdinand Rissner<sup>1</sup>, Gerold M. Rangger<sup>1</sup>, Oliver T. Hofmann<sup>1</sup>, Anna M. Trackl<sup>1</sup>, Georg  
Heimel<sup>2</sup>, and Egbert Zojer<sup>1,\*</sup>*

<sup>1</sup> Institute of Solid State Physics, Graz University of Technology, Petersgasse 16, 8010 Graz  
Austria)

<sup>2</sup> Institut für Physik, Humboldt-Universität zu Berlin, Newtonstrasse 15, 12389 Berlin (Germany)

---

\* To whom correspondence should be addressed: [egbert.zojer@tugraz.at](mailto:egbert.zojer@tugraz.at)

### Cartesian coordinates of the three component systems:

The metal/SAM systems were optimized using a damped molecular dynamics strategy as implemented in the VASP code. The isolated biphenyl monolayers were optimized with the same strategy, keeping the lowermost hydrogens fixed. For further details, see methods section in the main text. The Cartesian coordinates and lattice vectors of the complete three component systems as they were used are listed below.

#### System (1), Au|Pyr|2P|N(CH<sub>3</sub>)<sub>2</sub>||2P:

-----  
x: +5.1135503988 +0.0000000000 +0.0000000000  
y: +0.0000000000 +8.8569290977 +0.0000000000  
z: +0.0000000000 +0.0000000000 +60.0000000000  
-----

Au +5.1046188260 +8.8284446551 +9.6060870729  
Au +0.0142451693 +2.9083804250 +9.6030679211  
Au +5.1131733477 +5.8790926763 +9.7139941580  
Au +2.5671474872 +1.4486898301 +9.7254407725  
Au +2.5785165715 +4.3855073035 +9.5870067552  
Au +2.5503030649 +7.3559219073 +9.6033932576  
Au +3.4007313255 +8.8531072479 +7.2115428989  
Au +3.4069655355 +2.9162830713 +7.2074056827  
Au +3.4278596801 +5.8889655436 +7.2149611728  
Au +0.8733958726 +1.4549025756 +7.2119743959  
Au +0.8453329958 +4.4253290561 +7.2178849145  
Au +0.8428331790 +7.3473649120 +7.2170944383  
Au +1.7044997544 +0.0000000000 +4.8211662000  
Au +1.7044997544 +2.9522801761 +4.8211662000  
Au +1.7044997544 +5.9046489216 +4.8211662000  
Au +4.2612749538 +1.4761843727 +4.8211662000  
Au +4.2612749538 +4.4284645489 +4.8211662000  
Au +4.2612749538 +7.3807447250 +4.8211662000  
Au +0.0000000000 +0.0000000000 +2.4105828000  
Au +0.0000000000 +2.9522801761 +2.4105828000  
Au +0.0000000000 +5.9046489216 +2.4105828000  
Au +2.5567751994 +1.4761843727 +2.4105828000  
Au +2.5567751994 +4.4284645489 +2.4105828000  
Au +2.5567751994 +7.3807447250 +2.4105828000  
Au +3.4090506444 +0.0000000000 +0.0000000000  
Au +3.4090506444 +2.9522801761 +0.0000000000  
Au +3.4090506444 +5.9046489216 +0.0000000000  
Au +0.8522754450 +1.4761843727 +0.0000000000

Au +0.8522754450 +4.4284645489 +0.0000000000  
Au +0.8522754450 +7.3807447250 +0.0000000000  
N +2.5066394056 +1.2890721364 +12.4164060218  
N +0.0340357098 +5.6961228855 +12.2565344427  
C +3.4171617712 +1.8383225051 +13.2582909824  
C +1.5834851530 +0.4592596381 +12.9639445829  
C +3.4372359965 +1.5865176368 +14.6340747267  
C +1.5381397051 +0.1608635570 +14.3264015672  
C +2.4818003729 +0.7222310048 +15.2159711534  
C +4.2155423018 +6.2670461217 +13.0606872306  
C +0.9222422038 +4.8504125348 +12.8376631247  
C +4.1415078861 +6.0181040537 +14.4332241893  
C +0.9114568829 +4.5569933145 +14.2008054726  
C +5.0592616250 +5.1383474319 +15.0519988837  
C +2.4703861612 +0.4072646299 +16.6652824424  
C +1.5960543330 +8.2964114719 +17.2061119745  
C +3.3259176911 +1.0490353796 +17.5875891532  
C +1.5851648306 +7.9698003770 +18.5609499527  
C +3.3266099191 +0.7351299453 +18.9480674735  
C +5.0270854140 +4.8497834403 +16.5043567735  
C +4.1459419962 +5.5151178632 +17.3826313938  
C +2.4709279757 +8.5934049250 +19.4711166438  
C +5.0516389782 +4.3649536687 +19.3439189109  
C +0.7717185231 +3.8952319997 +17.0944687669  
C +4.1485363445 +5.2833063155 +18.7577635653  
C +0.7834314979 +3.6450436709 +18.4656424395  
H +4.1589921968 +2.4972694463 +12.7914916733  
H +0.8620062752 +0.0250659997 +12.2575401520  
H +4.2169964141 +2.0613026604 +15.2354355986  
H +0.7506155550 +8.3451702548 +14.6745212664  
H +3.5059300454 +6.9385195656 +12.5617273035  
H +1.6591152899 +4.3990256808 +12.1587176760  
H +3.3503261600 +6.5122717892 +15.0027040510  
H +1.6743110639 +3.8730309324 +14.5807416283  
H +0.8926753820 +7.7646975846 +16.5602766575  
H +4.0183646628 +1.8267455519 +17.2539879854  
H +0.8747320851 +7.2115179362 +18.8949696771  
H +4.0271793779 +1.2708622829 +19.5924889586  
H +3.4321177634 +6.2503244677 +17.0025820972  
H +1.4606259902 +3.3148299616 +16.4752207147  
H +3.4381170581 +5.8395674694 +19.3717078263  
H +1.4726191423 +2.8822654340 +18.8343929976  
N +2.5148228917 +8.1967925528 +20.8240375991  
N +0.0222473700 +4.2157081286 +20.7406245013  
C +1.4570964493 +7.3225206300 +21.3268402010  
C +3.1262538836 +0.2137041838 +21.8180723665  
C +0.7338107516 +3.0819333870 +21.3103813420  
C +4.1380584772 +4.8458585969 +21.5990177585

H +0.4525011405 +7.7901190064 +21.2797353962  
H +1.4129958253 +6.3796879057 +20.7593530471  
H +1.6738650141 +7.0731286934 +22.3774270851  
H +4.1372274552 +0.5150753089 +21.5049904608  
H +2.5413664553 +1.1378286270 +22.0157563432  
H +3.2254581517 +8.5186996432 +22.7666691202  
H +0.1685184516 +2.1279481198 +21.2419370671  
H +0.9366676788 +3.2812997368 +22.3757782665  
H +1.6967500800 +2.9283852167 +20.8014463919  
H +4.4670921075 +4.7569520402 +22.6471199591  
H +4.0355154753 +5.9172343976 +21.3608535282  
H +3.1336311975 +4.3848170127 +21.5118236176  
C +0.1761331425 +6.5139345346 +29.5732690776  
C +2.7483772090 +2.5358487379 +28.1517754345  
C +2.7358380168 +2.0854356266 +29.5732325878  
C +0.1636151474 +6.9643207442 +28.1518070737  
C +4.3478102499 +6.9979274829 +30.5087443818  
C +1.7968336251 +2.0649561817 +27.2191560341  
C +1.1152436281 +6.4935399189 +27.2192219858  
C +3.6776716057 +2.5694421772 +30.5087352787  
C +4.3694678447 +6.5891587261 +31.8463101303  
C +1.8011597901 +2.4978335462 +25.8890856126  
C +3.6559487062 +2.1606727600 +31.8463029125  
C +1.1108168244 +6.9263354592 +25.8891208717  
C +2.7583097054 +3.4187971116 +25.4458989757  
C +0.2206962443 +5.6787715721 +32.2961516587  
C +0.1535408367 +7.8471563487 +25.4459117654  
C +2.6911944129 +1.2502457140 +32.2960967321  
C +3.7142314547 +3.8957044802 +26.3510399578  
C +1.1595390412 +5.1796937462 +31.3843360584  
C +4.3111076821 +8.3239864764 +26.3510304624  
C +1.7523345493 +0.7511927884 +31.3842646318  
C +3.7086027410 +3.4593527600 +27.6800163633  
C +1.1361312088 +5.5912475733 +30.0472393135  
C +4.3167885863 +7.8876539100 +27.6800188934  
C +1.7757939333 +1.1627692439 +30.0471786005  
H +1.0287735866 +1.3485318819 +27.5192090783  
H +3.5767649438 +7.7099093673 +30.2059732141  
H +4.4487100129 +3.2814303432 +30.2059593076  
H +1.8834546218 +5.7772935758 +27.5193249926  
H +3.6164440992 +6.9850335773 +32.5345726184  
H +1.0382899349 +2.1177258573 +25.2027783319  
H +1.8737550897 +6.5463560137 +25.2028251723  
H +4.4089244238 +2.5565608388 +32.5346024940  
H +0.2384689303 +5.3576289320 +33.3427732542  
H +2.7550163878 +3.7708302402 +24.4108300000  
H +0.1567387849 +8.1991371088 +24.4108300000  
H +2.6734717093 +0.9290411372 +33.3426990938

H +4.4724988011 +4.6156733759 +26.0294945589  
H +1.9218095877 +4.4646639651 +31.7072366836  
H +0.9900320730 +0.0361709878 +31.7071316889  
H +3.5527321059 +0.1869148527 +26.0294792744  
H +1.8909840368 +5.1819801964 +29.3715342781  
H +4.4744388028 +3.8536040513 +28.3519282563  
H +3.5508738606 +8.2817969124 +28.3519070462  
H +1.0209144684 +0.7535442485 +29.3714759138

**System (2), Au|Pyr|2P|NH<sub>2</sub>||2P:**

-----  
x: +5.1135503988 +0.0000000000 +0.0000000000  
y: +0.0000000000 +8.8569290977 +0.0000000000  
z: +0.0000000000 +0.0000000000 +60.0000000000  
-----

Au +5.0858883015 +8.8208226106 +9.5915271478  
Au +5.1119388942 +2.9192227724 +9.6034231251  
Au +5.0901468311 +5.8782020417 +9.7215788767  
Au +2.5515357179 +1.4504317942 +9.7214656825  
Au +2.5556278621 +4.3930177519 +9.5976208346  
Au +2.5294412584 +7.3445597505 +9.5989656291  
Au +3.3868863439 +8.8540261445 +7.2120962838  
Au +3.3961307018 +2.9170978702 +7.2133099109  
Au +3.4201763849 +5.8858715276 +7.2124876425  
Au +0.8629422254 +1.4577787480 +7.2155625685  
Au +0.8381532605 +4.4261335982 +7.2166465006  
Au +0.8334166707 +7.3463771169 +7.2110748626  
Au +1.7044997544 +0.0000000000 +4.8211660106  
Au +1.7044997544 +2.9522801761 +4.8211660106  
Au +1.7044997544 +5.9046489216 +4.8211660106  
Au +4.2612749538 +1.4761843727 +4.8211660106  
Au +4.2612749538 +4.4284645489 +4.8211660106  
Au +4.2612749538 +7.3807447250 +4.8211660106  
Au +0.0000000000 +0.0000000000 +2.4105830053  
Au +0.0000000000 +2.9522801761 +2.4105830053  
Au +0.0000000000 +5.9046489216 +2.4105830053  
Au +2.5567751994 +1.4761843727 +2.4105830053  
Au +2.5567751994 +4.4284645489 +2.4105830053  
Au +2.5567751994 +7.3807447250 +2.4105830053  
Au +3.4090506443 +0.0000000000 +0.0000000000  
Au +3.4090506443 +2.9522801761 +0.0000000000  
Au +3.4090506443 +5.9046489216 +0.0000000000  
Au +0.8522754450 +1.4761843727 +0.0000000000  
Au +0.8522754450 +4.4284645489 +0.0000000000  
Au +0.8522754450 +7.3807447250 +0.0000000000  
N +2.4945945162 +1.2805939031 +12.3066210944  
N +5.1112945095 +5.7243447384 +12.3163393043  
C +3.3652222641 +1.9061501007 +13.1377806017

C +1.6222851222 +0.4060544210 +12.8683730684  
C +3.3898108972 +1.6893226910 +14.5184929882  
C +1.5910360793 +0.1349268092 +14.2359772629  
C +2.4883369688 +0.7790848368 +15.1169008586  
C +4.1938665881 +6.3100067703 +13.1262533044  
C +0.8931930210 +4.8877974403 +12.8990158056  
C +4.1412899149 +6.0870286465 +14.5052552929  
C +0.9044432863 +4.6195641849 +14.2674810518  
C +5.0680660314 +5.2176854587 +15.1254009180  
C +2.4769103325 +0.5107286672 +16.5757231492  
C +1.5568927055 +8.4635259404 +17.1550428823  
C +3.3800204753 +1.1404324053 +17.4617163558  
C +1.5331369034 +8.2044411806 +18.5242381370  
C +3.3622949310 +0.8934841835 +18.8348050475  
C +5.0552674309 +4.9444836255 +16.5830223653  
C +4.1805790912 +5.6163186219 +17.4666727843  
C +2.4344929346 +8.8492085213 +19.3925314332  
C +5.0691554698 +4.4249367310 +19.3993516367  
C +0.8128123089 +3.9935281318 +17.1628508998  
C +4.1835503561 +5.3669456992 +18.8397375579  
C +0.8244551293 +3.7349926951 +18.5322761990  
H +4.0648464789 +2.6003099614 +12.6566182453  
H +0.9345308978 +8.7670453860 +12.1690975659  
H +4.1261351720 +2.2382146278 +15.1113320380  
H +0.8539934988 +8.2684375643 +14.5928759341  
H +3.4770927222 +6.9738247532 +12.6276773988  
H +1.6186482697 +4.4236537893 +12.2165347097  
H +3.3596378928 +6.5923636245 +15.0784001041  
H +1.6715071228 +3.9397333439 +14.6453783380  
H +0.8302193102 +7.9383934295 +16.5303984611  
H +4.1261095268 +1.8448939897 +17.0856974358  
H +0.8025835480 +7.4898609279 +18.9190204243  
H +4.0891053822 +1.4011564455 +19.4789165970  
H +3.4756905958 +6.3624520464 +17.0900611649  
H +1.5052617049 +3.4253481861 +16.5369094415  
H +3.4826754431 +5.9103704529 +19.4835588968  
H +1.5177242784 +2.9840379611 +18.9277462006  
H +1.9105644715 +7.7690580263 +21.0801716686  
H +3.2291044378 +8.8304345186 +21.3076715409  
H +4.2767149679 +4.4426660343 +21.3160863755  
H +0.4425292783 +3.3337574966 +21.0904835442  
N +2.3694018782 +8.6368744217 +20.7849381102  
N +0.0137706826 +4.2156822925 +20.7921159552  
C +0.1161331425 +6.5139345346 +28.5032690776  
C +2.6883772090 +2.5358487379 +27.0817754345  
C +2.6758380168 +2.0854356266 +28.5032325878  
C +0.1036151474 +6.9643207442 +27.0818070737  
C -0.8257401489 +6.9979274829 +29.4387443818

C +1.7368336251 +2.0649561817 +26.1491560341  
C +1.0552436281 +6.4935399189 +26.1492219858  
C -1.4958787931 +2.5694421772 +29.4387352787  
C -0.8040825541 +6.5891587261 +30.7763101303  
C +1.7411597901 +2.4978335462 +24.8190856126  
C +3.5959487062 +2.1606727600 +30.7763029125  
C +1.0508168244 +6.9263354592 +24.8191208717  
C +2.6983097054 +3.4187971116 +24.3758989757  
C +0.1606962443 +5.6787715721 +31.2261516587  
C +0.0935408367 +7.8471563487 +24.3759117654  
C +2.6311944129 +1.2502457140 +31.2260967321  
C -1.4593189441 +3.8957044802 +25.2810399578  
C +1.0995390412 +5.1796937462 +30.3143360584  
C -0.8624427167 +8.3239864764 +25.2810304624  
C +1.6923345493 +0.7511927884 +30.3142646318  
C -1.4649476578 +3.4593527600 +26.6100163633  
C +1.0761312088 +5.5912475733 +28.9772393135  
C -0.8567618125 +7.8876539100 +26.6100188934  
C +1.7157939333 +1.1627692439 +28.9771786005  
H +0.9687735866 +1.3485318819 +26.4492090783  
H +3.5167649438 +7.7099093673 +29.1359732141  
H -0.7248403859 +3.2814303432 +29.1359593076  
H +1.8234546218 +5.7772935758 +26.4493249926  
H +3.5564440992 +6.9850335773 +31.4645726184  
H +0.9782899349 +2.1177258573 +24.1327783319  
H +1.8137550897 +6.5463560137 +24.1328251723  
H -0.7646259750 +2.5565608388 +31.4646024940  
H +0.1784689303 +5.3576289320 +32.2727732542  
H +2.6950163878 +3.7708302402 +23.3408300000  
H +0.0967387849 +8.1991371088 +23.3408300000  
H +2.6134717093 +0.9290411372 +32.2726990938  
H -0.7010515977 +4.6156733759 +24.9594945589  
H +1.8618095877 +4.4646639651 +30.6372366836  
H +0.9300320730 +8.8931000855 +30.6371316889  
H +3.4927321059 +9.0438439504 +24.9594792744  
H +1.8309840368 +5.1819801964 +28.3015342781  
H -0.6991115960 +3.8536040513 +27.2819282563  
H +3.4908738606 +8.2817969124 +27.2819070462  
H +0.9609144684 +0.7535442485 +28.3014759138

**System (3), Au|CN|2P|NH<sub>2</sub>||2P:**

-----  
x: +5.1135503988 +0.0000000000 +0.0000000000  
y: +0.0000000000 +8.8569300817 +0.0000000000  
z: +0.0000000000 +0.0000000000 +60.0000000000  
-----

Au +0.0080373051 +8.7096491735 +9.6846459619  
Au +5.0558816622 +2.9208299097 +9.7508535403

Au +4.9829902025 +5.7895480319 +9.6935960375  
Au +2.4236836521 +1.4145252691 +9.7200045354  
Au +2.4953594195 +4.2855532823 +9.6748483317  
Au +2.5738068858 +7.3704042165 +9.7520287509  
Au +3.3711002965 +8.8003030274 +7.2438737776  
Au +3.3866979581 +2.9027065676 +7.2182910696  
Au +3.3802822475 +5.8600400642 +7.2321940555  
Au +0.8299034112 +1.4334626738 +7.2348635592  
Au +0.8178813831 +4.3728871678 +7.2201848907  
Au +0.8223104067 +7.3368753126 +7.2310617693  
Au +1.7044997544 +0.0000000000 +4.8211658864  
Au +1.7044997544 +2.9522805041 +4.8211658864  
Au +1.7044997544 +5.9046495776 +4.8211658864  
Au +4.2612749538 +1.4761845367 +4.8211658864  
Au +4.2612749538 +4.4284650409 +4.8211658864  
Au +4.2612749538 +7.3807455450 +4.8211658864  
Au +0.0000000000 +0.0000000000 +2.4105829432  
Au +0.0000000000 +2.9522805041 +2.4105829432  
Au +0.0000000000 +5.9046495776 +2.4105829432  
Au +2.5567751994 +1.4761845367 +2.4105829432  
Au +2.5567751994 +4.4284650409 +2.4105829432  
Au +2.5567751994 +7.3807455450 +2.4105829432  
Au +3.4090506443 +0.0000000000 +0.0000000000  
Au +3.4090506443 +2.9522805041 +0.0000000000  
Au +3.4090506443 +5.9046495776 +0.0000000000  
Au +0.8522754450 +1.4761845367 +0.0000000000  
Au +0.8522754450 +4.4284650409 +0.0000000000  
Au +0.8522754450 +7.3807455450 +0.0000000000  
N +4.1996880584 +1.2588843031 +12.3132347207  
N +1.5959293695 +5.8375148543 +12.2997429725  
C +4.1918739556 +1.3024143333 +11.0803220830  
C +1.6327636363 +5.9157102567 +11.0689503274  
C +4.1488598358 +0.9936537547 +13.6491807931  
C +5.0300069925 +1.6461106624 +14.5431648734  
C +3.2208078444 +0.0601184094 +14.1733849197  
C +4.9876827395 +1.3582739476 +15.9042741137  
C +3.1973689387 +8.6447644069 +15.5389839906  
C +4.0786282759 +0.4195034975 +16.4512615297  
C +1.5560341411 +5.4996682770 +13.6192851020  
C +0.5992935655 +6.0876536810 +14.4797873423  
C +2.4772870977 +4.5716706085 +14.1633165999  
C +0.5784687474 +5.7622847862 +15.8325951369  
C +2.4427690731 +4.2682226056 +15.5217506998  
C +1.5023333947 +4.8538886214 +16.4049573926  
C +4.0546830772 +0.1166824099 +17.9028959166  
C +3.1191664746 +8.0759848735 +18.4698860851  
C +4.9709812450 +0.7095923726 +18.8030900026  
C +3.0917449582 +7.7949687991 +19.8364022528



C +4.9483837441 +0.4406588622 +20.1718461522  
C +4.0038937150 +8.4071798162 +20.7150601967  
C +1.4947853764 +4.5456269564 +17.8550346624  
C +0.6133301044 +5.1931256975 +18.7524655188  
C +2.3789373431 +3.5992197907 +18.4249329323  
C +0.6248414438 +4.9304791373 +20.1227011748  
C +2.3987572471 +3.3284534101 +19.7936224891  
C +1.5250089958 +3.9974880335 +20.6700039762  
H +0.6361145256 +2.3711999957 +14.1547106993  
H +2.5281473064 +8.4130931976 +13.4941831359  
H +0.5803075344 +1.8859711756 +16.5500450781  
H +2.4660707741 +7.9110363623 +15.8884405020  
H +4.9867578354 +6.7951183710 +14.0718631545  
H +3.2202293811 +4.1087286509 +13.5086731009  
H +4.9228974621 +6.2335854484 +16.4494450366  
H +3.1853292458 +3.5569106170 +15.8920758128  
H +2.3804810045 +7.5738907051 +17.8399959163  
H +0.6237227334 +1.3997913448 +18.4432430432  
H +2.3479798814 +7.0873651946 +20.2192034489  
H +0.5763217190 +0.9199733285 +20.8215104237  
H +5.0065990434 +5.9312750361 +18.3912667372  
H +3.0790514867 +3.0458481995 +17.7938979567  
H +5.0307513135 +5.4582698461 +20.7725217089  
H +3.1050197536 +2.5842147699 +20.1789985375  
H +3.4859751809 +7.2942354872 +22.3797315798  
H +4.8122352341 +8.3345618147 +22.6177449478  
H +0.7185384292 +3.9728753714 +22.5736899573  
H +2.0099781546 +2.8890090474 +22.3463486339  
N +3.9369197142 +8.1744084155 +22.1090218454  
N +1.5886675978 +3.7810238007 +22.0668755997  
C +1.6910304599 +6.0792762421 +29.7780281224  
C +4.2632745264 +2.1011904454 +28.3565344793  
C +4.2507353342 +1.6507773341 +29.7779916326  
C +1.6785124648 +6.5296624517 +28.3565661185  
C +0.7491571685 +6.5632691904 +30.7135034266  
C +3.3117309425 +1.6302978892 +27.4239150789  
C +2.6301409455 +6.0588816264 +27.4239810306  
C +0.0790185243 +2.1347838847 +30.7134943235  
C +0.7708147633 +6.1545004336 +32.0510691751  
C +3.3160571075 +2.0631752537 +26.0938446574  
C +0.0572956248 +1.7260144675 +32.0510619573  
C +2.6257141418 +6.4916771667 +26.0938799165  
C +4.2732070228 +2.9841388191 +25.6506580205  
C +1.7355935617 +5.2441132796 +32.5009107035  
C +1.6684381541 +7.4124980562 +25.6506708102  
C +4.2060917303 +0.8155874215 +32.5008557769  
C +0.1155783733 +3.4610461877 +26.5557990026  
C +2.6744363586 +4.7450354537 +31.5890951032

C +0.7124546007 +7.8893281839 +26.5557895072  
C +3.2672318667 +0.3165344959 +31.5890236766  
C +0.1099496596 +3.0246944675 +27.8847754081  
C +2.6510285262 +5.1565892808 +30.2519983583  
C +0.7181355049 +7.4529956175 +27.8847779382  
C +3.2906912507 +0.7281109514 +30.2519376453  
H +2.5436709040 +0.9138735894 +27.7239681231  
H +5.0916622612 +7.2752510748 +30.4107322589  
H +0.8500569315 +2.8467720507 +30.4107183524  
H +3.3983519392 +5.3426352833 +27.7240840374  
H +0.0177910178 +6.5503752848 +32.7393316632  
H +2.5531872523 +1.6830675648 +25.4075373767  
H +3.3886524071 +6.1116977212 +25.4075842171  
H +0.8102713424 +2.1219025463 +32.7393615388  
H +1.7533662477 +4.9229706395 +33.5475322990  
H +4.2699137052 +3.3361719477 +24.6155890448  
H +1.6716361023 +7.7644788163 +24.6155890448  
H +4.1883690267 +0.4943828447 +33.5474581386  
H +0.8738457197 +4.1810150834 +26.2342536037  
H +3.4367069051 +4.0300056726 +31.9119957284  
H +2.5049293904 +8.4584417930 +31.9118907337  
H +5.0676294233 +8.6091856579 +26.2342383192  
H +3.4058813542 +4.7473219039 +29.5762933229  
H +0.8757857214 +3.4189457588 +28.5566873011  
H +5.0657711780 +7.8471386199 +28.5566660910  
H +2.5358117858 +0.3188859560 +29.5762349586

**System (4), Au|Pyr|2P|H||2P:**

-----  
x: +5.1135503988 +0.0000000000 +0.0000000000  
y: +0.0000000000 +8.8569290977 +0.0000000000  
z: +0.0000000000 +0.0000000000 +60.0000000000  
-----

Au +5.0829005601 +8.8288694075 +9.5938403968  
Au +5.1084023934 +2.9245993470 +9.6036410067  
Au +5.0883221129 +5.8851194730 +9.7218177824  
Au +2.5466382427 +1.4553730626 +9.7249819191  
Au +2.5539347110 +4.3985304864 +9.5972680755  
Au +2.5279513101 +7.3520154442 +9.5990727956  
Au +3.3870524711 +0.0018674146 +7.2112612156  
Au +3.3958332491 +2.9217572360 +7.2127717249  
Au +3.4196171966 +5.8908586693 +7.2121153017  
Au +0.8627045200 +1.4624584065 +7.2150735878  
Au +0.8377196853 +4.4304754506 +7.2164343678  
Au +0.8331024678 +7.3517480651 +7.2118260818  
Au +1.7044997544 +0.0000000000 +4.8211660106  
Au +1.7044997544 +2.9522801761 +4.8211660106  
Au +1.7044997544 +5.9046489216 +4.8211660106

Au +4.2612749538 +1.4761843727 +4.8211660106  
Au +4.2612749538 +4.4284645489 +4.8211660106  
Au +4.2612749538 +7.3807447250 +4.8211660106  
Au +0.0000000000 +0.0000000000 +2.4105830053  
Au +0.0000000000 +2.9522801761 +2.4105830053  
Au +0.0000000000 +5.9046489216 +2.4105830053  
Au +2.5567751994 +1.4761843727 +2.4105830053  
Au +2.5567751994 +4.4284645489 +2.4105830053  
Au +2.5567751994 +7.3807447250 +2.4105830053  
Au +3.4090506443 +0.0000000000 +0.0000000000  
Au +3.4090506443 +2.9522801761 +0.0000000000  
Au +3.4090506443 +5.9046489216 +0.0000000000  
Au +0.8522754450 +1.4761843727 +0.0000000000  
Au +0.8522754450 +4.4284645489 +0.0000000000  
Au +0.8522754450 +7.3807447250 +0.0000000000  
N +2.4829617998 +1.2782039386 +12.3273729500  
N +5.1133595827 +5.7232076634 +12.3197536645  
C +3.3439081113 +1.9168533325 +13.1593607390  
C +1.6273992022 +0.3863579746 +12.8886792667  
C +3.3754493108 +1.6958351805 +14.5392899135  
C +1.6035230012 +0.1105170057 +14.2563574790  
C +2.4916143980 +0.7678580297 +15.1369378517  
C +4.2008929308 +6.3134386536 +13.1328385197  
C +0.8888060488 +4.8766685537 +12.8988944928  
C +4.1472170244 +6.0849365446 +14.5109710409  
C +0.8996810995 +4.6042434779 +14.2670433910  
C +5.0688757075 +5.2074873409 +15.1274643772  
C +2.4914106639 +0.4973135237 +16.5989932758  
C +1.5781011274 +8.4427636626 +17.1788386553  
C +3.3999311635 +1.1418751318 +17.4696200251  
C +1.5716797690 +8.1898294782 +18.5542203623  
C +3.3934888517 +0.8924072220 +18.8457524722  
C +2.4787298643 +8.8431750733 +19.3996562504  
C +5.0547020051 +4.9328707998 +16.5882449764  
C +4.1913685493 +5.6294285659 +17.4647012539  
C +0.7993639860 +3.9645443311 +17.1598546062  
C +4.1897140062 +5.3737734400 +18.8400649709  
C +0.8029609067 +3.7111720544 +18.5350872336  
C +5.0545413652 +4.4155590883 +19.3866806211  
H +4.0289397615 +2.6268930149 +12.6802227400  
H +0.9475178984 +8.7368657483 +12.1893148115  
H +4.1009693654 +2.2575992321 +15.1332819848  
H +0.8810004320 +8.2297210196 +14.6138404223  
H +3.4902279372 +6.9867777741 +12.6382733608  
H +1.6089945810 +4.4080397477 +12.2137948581  
H +3.3705003773 +6.5938538924 +15.0874731422  
H +1.6613141782 +3.9173310314 +14.6431489961  
H +0.8496139008 +7.9178812137 +16.5559677113

H +4.1308186019 +1.8549412502 +17.0810034126  
H +0.8490691734 +7.4750978810 +18.9592103974  
H +4.1156689731 +1.4119279490 +19.4830710689  
H +2.4732502610 +8.6464770936 +20.4771266873  
H +3.5095121451 +6.3936177131 +17.0826293394  
H +1.4807697704 +3.3887063754 +16.5285379559  
H +3.5042328668 +5.9341158169 +19.4834736860  
H +1.4846310829 +2.9535067087 +18.9340590286  
H +5.0557990000 +4.2181780000 +20.4639550000  
C +5.0090618019 +6.4795198283 +26.3976392918  
C +2.4677554696 +2.5014340316 +24.9761456487  
C +2.4552162774 +2.0510209203 +26.3976028020  
C +4.9965438068 +6.9299060379 +24.9761772879  
C +4.0671885105 +6.9635127766 +27.3331145960  
C +1.5162118857 +2.0305414754 +24.0435262483  
C +0.8346218887 +6.4591252126 +24.0435922000  
C +3.3970498663 +2.5350274709 +27.3331054929  
C +4.0888461053 +6.5547440198 +28.6706803445  
C +1.5205380507 +2.4634188399 +22.7134558268  
C +3.3753269668 +2.1262580537 +28.6706731267  
C +0.8301950850 +6.8919207529 +22.7134910859  
C +2.4776879660 +3.3843824053 +22.2702691899  
C +5.0536249037 +5.6443568658 +29.1205218729  
C +4.9864694961 +7.8127416424 +22.2702819796  
C +2.4105726735 +1.2158310077 +29.1204669463  
C +3.4336097153 +3.8612897739 +23.1754101720  
C +0.8789173018 +5.1452790399 +28.2087062726  
C +4.0304859427 +8.2895717701 +23.1754006766  
C +1.4717128099 +0.7167780821 +28.2086348460  
C +3.4279810016 +3.4249380537 +24.5043865775  
C +0.8555094694 +5.5568328670 +26.8716095277  
C +4.0361668469 +7.8532392037 +24.5043891076  
C +1.4951721939 +1.1283545376 +26.8715488147  
H +0.7481518472 +1.3141171756 +24.3435792925  
H +3.2961432044 +7.6754946610 +27.0303434283  
H +4.1680882735 +3.2470156369 +27.0303295218  
H +1.6028328824 +5.7428788695 +24.3436952068  
H +3.3358223598 +6.9506188710 +29.3589428326  
H +0.7576681955 +2.0833111510 +22.0271485461  
H +1.5931333503 +6.5119413074 +22.0271953865  
H +4.1283026844 +2.5221461325 +29.3589727082  
H +5.0713975897 +5.3232142257 +30.1671434684  
H +2.4743946484 +3.7364155339 +21.2352002142  
H +4.9896674443 +8.1647224025 +21.2352002142  
H +2.3928499699 +0.8946264309 +30.1670693080  
H +4.1918770617 +4.5812586696 +22.8538647731  
H +1.6411878483 +4.4302492588 +28.5316068978  
H +0.7094103336 +0.0017562815 +28.5315019031

H +3.2721103665 +0.1525001464 +22.8538494886  
H +1.6103622974 +5.1475654901 +26.1959044923  
H +4.1938170634 +3.8191893450 +25.1762984705  
H +3.2702521212 +8.2473822061 +25.1762772604  
H +0.7402927290 +0.7191295422 +26.1958461280

**System (5), Au<sub>1</sub>Si<sub>2</sub>P<sub>1</sub>NH<sub>2</sub>||2P:**

-----  
x: +5.1135503988 +0.0000000000 +0.0000000000  
y: +0.0000000000 +8.8569300817 +0.0000000000  
z: +0.0000000000 +0.0000000000 +60.0000000000  
-----

Au +0.0744766025 +8.6915997760 +9.6895315301  
Au +0.0961857162 +3.0667841533 +9.5240724774  
Au +4.9567386450 +5.8770236523 +9.6697550074  
Au +2.3944329751 +1.4348079849 +9.6843184863  
Au +2.6501393155 +4.2567347151 +9.7237318043  
Au +2.6356701378 +7.4834750428 +9.5066572883  
Au +3.4316124487 +0.0438919496 +7.1824603744  
Au +3.3954268835 +2.9628316541 +7.2630370731  
Au +3.4223235422 +5.8909210758 +7.2315569038  
Au +0.8674812695 +1.4678449395 +7.2365692773  
Au +0.8772834101 +4.4667503417 +7.1918480991  
Au +0.8369913514 +7.3888926083 +7.2398698175  
Au +1.7044997544 +0.0000000000 +4.8211658864  
Au +1.7044997544 +2.9522805041 +4.8211658864  
Au +1.7044997544 +5.9046495776 +4.8211658864  
Au +4.2612749538 +1.4761845367 +4.8211658864  
Au +4.2612749538 +4.4284650409 +4.8211658864  
Au +4.2612749538 +7.3807455450 +4.8211658864  
Au +0.0000000000 +0.0000000000 +2.4105829432  
Au +0.0000000000 +2.9522805041 +2.4105829432  
Au +0.0000000000 +5.9046495776 +2.4105829432  
Au +2.5567751994 +1.4761845367 +2.4105829432  
Au +2.5567751994 +4.4284650409 +2.4105829432  
Au +2.5567751994 +7.3807455450 +2.4105829432  
Au +3.4090506443 +0.0000000000 +0.0000000000  
Au +3.4090506443 +2.9522805041 +0.0000000000  
Au +3.4090506443 +5.9046495776 +0.0000000000  
Au +0.8522754450 +1.4761845367 +0.0000000000  
Au +0.8522754450 +4.4284650409 +0.0000000000  
Au +0.8522754450 +7.3807455450 +0.0000000000  
S +4.2419913314 +1.3958272429 +11.4102515298  
S +1.6780078946 +5.7927950674 +11.4235612530  
C +4.1988537007 +0.9268137311 +13.1270577425  
C +5.1026853497 +1.5611191649 +14.0000793550  
C +3.2882850367 +8.8475690598 +13.6492864943  
C +5.0878922278 +1.2671273898 +15.3628837322

C +3.2870705640 +8.5624903551 +15.0173266567  
C +4.1804893208 +0.3347347466 +15.9174987131  
C +1.5897595092 +5.3006704328 +13.1290085857  
C +0.6379937069 +5.8983640938 +13.9768858042  
C +2.5286078037 +4.4095737229 +13.6805545585  
C +0.6397196743 +5.6170736407 +15.3437652029  
C +2.5239736459 +4.1462193913 +15.0512995706  
C +1.5867377909 +4.7425459532 +15.9276062189  
C +4.1612818186 +0.0516515961 +17.3750175724  
C +3.2235166153 +8.0247217846 +17.9568535691  
C +5.0736277611 +0.6648002262 +18.2646820874  
C +3.1850673647 +7.7810253726 +19.3301536122  
C +5.0406728794 +0.4336162759 +19.6402681462  
C +4.0877057154 +8.4196558254 +20.1993503126  
C +1.6067439282 +4.4740762559 +17.3873553181  
C +0.7596487953 +5.1615359675 +18.2866160426  
C +2.4852106094 +3.5247162189 +17.9594822508  
C +0.7974652767 +4.9318683661 +19.6628553228  
C +2.5328830728 +3.2879275359 +19.3335562139  
C +1.6930947918 +3.9958366566 +20.2122858533  
H +0.7033778213 +2.2925563458 +13.6113847733  
H +2.5779304147 +8.3452841428 +12.9856598227  
H +0.6930497756 +1.7920364435 +15.9971361372  
H +2.5587286437 +7.8297350911 +15.3751765630  
H +5.0091767098 +6.5890255327 +13.5668342505  
H +3.2757002367 +3.9369664841 +13.0357776291  
H +4.9859482617 +6.0961197353 +15.9575066676  
H +3.2888758122 +3.4648321543 +15.4320338028  
H +2.4899369115 +7.5072378396 +17.3336330263  
H +0.7291313115 +1.3452291482 +17.8925724161  
H +2.4376511804 +7.0850470857 +19.7258150491  
H +0.6631999938 +0.9315189631 +20.2820630188  
H +0.0485669515 +5.9072778839 +17.9222532281  
H +3.1573329713 +2.9405562474 +17.3258531787  
H +0.1166665033 +5.4904034224 +20.3158336367  
H +3.2342480995 +2.5404395540 +19.7210083034  
H +3.5480146926 +7.3618431234 +21.8923792589  
H +4.8661737449 +8.4164644157 +22.1160344327  
H +0.9359015107 +4.0326142018 +22.1366863466  
H +2.2039611934 +2.9216797287 +21.9025364606  
N +3.9998060000 +8.2344670000 +21.5994700000  
N +1.7888849921 +3.8132757489 +21.6122556831  
C +1.7465372643 +6.1115271129 +29.3178009674  
C +4.3187813308 +2.1334413162 +27.8963073243  
C +4.3062421386 +1.6830282049 +29.3177644776  
C +1.7340192692 +6.5619133225 +27.8963389635  
C +0.8046639729 +6.5955200612 +30.2532762716  
C +3.3672377469 +1.6625487600 +26.9636879239

C +2.6856477499 +6.0911324972 +26.9637538756  
C +0.1345253287 +2.1670347555 +30.2532671685  
C +0.8263215677 +6.1867513044 +31.5908420201  
C +3.3715639119 +2.0954261245 +25.6336175024  
C +0.1128024292 +1.7582653383 +31.5908348023  
C +2.6812209462 +6.5239280375 +25.6336527615  
C +4.3287138272 +3.0163896899 +25.1904308655  
C +1.7911003661 +5.2763641504 +32.0406835485  
C +1.7239449585 +7.4447489270 +25.1904436552  
C +4.2615985347 +0.8478382923 +32.0406286219  
C +0.1710851777 +3.4932970585 +26.0955718476  
C +2.7299431630 +4.7772863245 +31.1288679482  
C +0.7679614051 +7.9215790547 +26.0955623522  
C +3.3227386711 +0.3487853667 +31.1287965216  
C +0.1654564640 +3.0569453383 +27.4245482531  
C +2.7065353306 +5.1888401516 +29.7917712033  
C +0.7736423093 +7.4852464883 +27.4245507832  
C +3.3461980551 +0.7603618222 +29.7917104903  
H +2.5991777084 +0.9461244602 +27.2637409681  
H +0.0336186668 +7.3075019456 +29.9505051039  
H +0.9055637359 +2.8790229215 +29.9504911974  
H +3.4538587436 +5.3748861541 +27.2638568824  
H +0.0732978222 +6.5826261556 +32.2791045082  
H +2.6086940567 +1.7153184356 +24.9473102217  
H +3.4441592115 +6.1439485920 +24.9473570621  
H +0.8657781468 +2.1541534171 +32.2791343838  
H +1.8088730521 +4.9552215103 +33.0873051440  
H +4.3254205096 +3.3684228185 +24.1553618898  
H +1.7271429067 +7.7967296871 +24.1553618898  
H +4.2438758311 +0.5266337155 +33.0872309836  
H +0.9293525241 +4.2132659542 +25.7740264487  
H +3.4922137095 +4.0622565434 +31.4517685734  
H +2.5604361948 +8.4906926638 +31.4516635787  
H +0.0095858289 +8.6414365287 +25.7740111642  
H +3.4613881586 +4.7795727747 +29.1160661679  
H +0.9312925258 +3.4511966296 +28.0964601461  
H +0.0077275836 +7.8793894907 +28.0964389360  
H +2.5913185902 +0.3511368268 +29.1160078036

**System (6), Au|CN|2P|H||2P:**

-----  
x: +5.1135503988 +0.0000000000 +0.0000000000  
y: +0.0000000000 +8.8569300817 +0.0000000000  
z: +0.0000000000 +0.0000000000 +60.0000000000  
-----

Au +0.0044794701 +8.7136869515 +9.6833533384  
Au +5.0535991339 +2.9200678494 +9.7510434492  
Au +4.9837838303 +5.7912188740 +9.6915938736

Au +2.4197269351 +1.4177730828 +9.7234240729  
Au +2.4964966673 +4.2875069986 +9.6750675255  
Au +2.5707403055 +7.3699135195 +9.7528998335  
Au +3.3720541072 +8.8040364953 +7.2436115782  
Au +3.3888112119 +2.9066496004 +7.2181202522  
Au +3.3822812080 +5.8642796903 +7.2318846627  
Au +0.8316473827 +1.4378074587 +7.2357332643  
Au +0.8204180260 +4.3771037033 +7.2193880268  
Au +0.8238645589 +7.3415624863 +7.2310243870  
Au +1.7044997544 +0.0000000000 +4.8211658864  
Au +1.7044997544 +2.9522805041 +4.8211658864  
Au +1.7044997544 +5.9046495776 +4.8211658864  
Au +4.2612749538 +1.4761845367 +4.8211658864  
Au +4.2612749538 +4.4284650409 +4.8211658864  
Au +4.2612749538 +7.3807455450 +4.8211658864  
Au +0.0000000000 +0.0000000000 +2.4105829432  
Au +0.0000000000 +2.9522805041 +2.4105829432  
Au +0.0000000000 +5.9046495776 +2.4105829432  
Au +2.5567751994 +1.4761845367 +2.4105829432  
Au +2.5567751994 +4.4284650409 +2.4105829432  
Au +2.5567751994 +7.3807455450 +2.4105829432  
Au +3.4090506443 +0.0000000000 +0.0000000000  
Au +3.4090506443 +2.9522805041 +0.0000000000  
Au +3.4090506443 +5.9046495776 +0.0000000000  
Au +0.8522754450 +1.4761845367 +0.0000000000  
Au +0.8522754450 +4.4284650409 +0.0000000000  
Au +0.8522754450 +7.3807455450 +0.0000000000  
N +4.1832472883 +1.2432738464 +12.3189210045  
N +1.5920885760 +5.8313673381 +12.3020324350  
C +4.1771008007 +1.2911544104 +11.0865534885  
C +1.6307061086 +5.9135950770 +11.0717476917  
C +4.1371077230 +0.9777785102 +13.6554271524  
C +5.0201002652 +1.6322170740 +14.5461746776  
C +3.2127209903 +0.0416807130 +14.1818252985  
C +4.9828378235 +1.3437822889 +15.9075835420  
C +3.1946292490 +8.6265259026 +15.5479430401  
C +4.0774019086 +0.4033445959 +16.4568016318  
C +1.5483881743 +5.4906766656 +13.6211972369  
C +0.5855322020 +6.0732500986 +14.4786656775  
C +2.4721203725 +4.5657120294 +14.1662497814  
C +0.5626950859 +5.7465799464 +15.8313812299  
C +2.4357476885 +4.2625393127 +15.5251230964  
C +1.4909885711 +4.8444661899 +16.4056378691  
C +4.0614834262 +0.0978247928 +17.9114372106  
C +3.1217662694 +8.0588763967 +18.4742838779  
C +4.9900223618 +0.6913099637 +18.7990605769  
C +3.1096318143 +7.7747815074 +19.8442049435  
C +4.9766453139 +0.4123520938 +20.1690721977



C +4.0353225023 +8.3801261077 +20.7046164324  
C +1.4807512432 +4.5362450230 +17.8591867839  
C +0.6022432847 +5.1989648164 +18.7486665345  
C +2.3594586301 +3.5794397232 +18.4204940106  
C +0.6059506087 +4.9249756843 +20.1199912077  
C +2.3688829035 +3.3082848088 +19.7929959031  
C +1.4923794568 +3.9807206544 +20.6550826657  
H +0.6237304234 +2.3583170590 +14.1547039765  
H +2.5193440105 +8.3924018128 +13.5048789127  
H +0.5760977015 +1.8718324604 +16.5522016743  
H +2.4674568146 +7.8906124390 +15.9014257794  
H +4.9704783721 +6.7770749045 +14.0685405779  
H +3.2183101009 +4.1061347844 +13.5127572266  
H +4.9023914486 +6.2107273673 +16.4476102656  
H +3.1806334616 +3.5555791536 +15.8988902301  
H +2.3731169233 +7.5714795343 +17.8446073754  
H +0.6351950034 +1.3848075891 +18.4299570428  
H +2.3658965901 +7.0732949311 +20.2336381496  
H +0.6050761916 +0.8921851379 +20.8147769940  
H +4.0254482365 +8.1586497141 +21.7771537870  
H +5.0145878579 +5.9530349866 +18.3827777147  
H +3.0587928962 +3.0296369315 +17.7853841882  
H +5.0203406021 +5.4617056473 +20.7688201629  
H +3.0700938426 +2.5636472691 +20.1822932763  
H +1.4993389989 +3.7711391179 +21.7298839036  
C +1.4826531425 +6.0139345346 +27.6829590776  
C +4.0548972090 +2.0358487379 +26.2614654345  
C +4.0423580168 +1.5854356266 +27.6829225878  
C +1.4701351474 +6.4643207442 +26.2614970737  
C +0.5407798511 +6.4979274829 +28.6184343818  
C +3.1033536251 +1.5649561817 +25.3288460341  
C +2.4217636281 +5.9935399189 +25.3289119858  
C -0.1293587931 +2.0694421772 +28.6184252787  
C +0.5624374459 +6.0891587261 +29.9560001303  
C +3.1076797901 +1.9978335462 +23.9987756126  
C +4.9624687062 +1.6606727600 +29.9559929125  
C +2.4173368244 +6.4263354592 +23.9988108717  
C +4.0648297054 +2.9187971116 +23.5555889757  
C +1.5272162443 +5.1787715721 +30.4058416587  
C +1.4600608367 +7.3471563487 +23.5556017654  
C +3.9977144129 +0.7502457140 +30.4057867321  
C -0.0927989441 +3.3957044802 +24.4607299578  
C +2.4660590412 +4.6796937462 +29.4940260584  
C +0.5040772833 +7.8239864764 +24.4607204624  
C +3.0588545493 +0.2511927884 +29.4939546318  
C -0.0984276578 +2.9593527600 +25.7897063633  
C +2.4426512088 +5.0912475733 +28.1569293135  
C +0.5097581875 +7.3876539100 +25.7897088934

C +3.0823139333 +0.6627692439 +28.1568686005  
H +2.3352935866 +0.8485318819 +25.6288990783  
H +4.8832849438 +7.2099093673 +28.3156632141  
H +0.6416796141 +2.7814303432 +28.3156493076  
H +3.1899746218 +5.2772935758 +25.6290149926  
H +4.9229640992 +6.4850335773 +30.6442626184  
H +2.3448099349 +1.6177258573 +23.3124683319  
H +3.1802750897 +6.0463560137 +23.3125151723  
H +0.6018940250 +2.0565608388 +30.6442924940  
H +1.5449889303 +4.8576289320 +31.4524632542  
H +4.0615363878 +3.2708302402 +22.5205200000  
H +1.4632587849 +7.6991371088 +22.5205200000  
H +3.9799917093 +0.4290411372 +31.4523890938  
H +0.6654684023 +4.1156733759 +24.1391845589  
H +3.2283295877 +3.9646639651 +29.8169266836  
H +2.2965520730 +8.3931000855 +29.8168216889  
H +4.8592521059 +8.5438439504 +24.1391692744  
H +3.1975040368 +4.6819801964 +27.4812242781  
H +0.6674084040 +3.3536040513 +26.4616182563  
H +4.8573938606 +7.7817969124 +26.4615970462  
H +2.3274344684 +0.2535442485 +27.4811659138

**System (7), AuSI2PIHII2P:**

-----  
x: +5.1135503988 +0.0000000000 +0.0000000000  
y: +0.0000000000 +8.8569300817 +0.0000000000  
z: +0.0000000000 +0.0000000000 +60.0000000000  
-----

Au +0.0754299819 +8.6944142716 +9.6879716603  
Au +0.0982722116 +3.0712467890 +9.5261945593  
Au +4.9562013394 +5.8810458589 +9.6676872659  
Au +2.3947472414 +1.4379757403 +9.6827194511  
Au +2.6522451853 +4.2587751174 +9.7209338012  
Au +2.6361426151 +7.4873918401 +9.5096682112  
Au +3.4312587937 +0.0444883598 +7.1833017269  
Au +3.3965275594 +2.9647510617 +7.2623565320  
Au +3.4220237217 +5.8937555536 +7.2310243870  
Au +0.8674166677 +1.4705515292 +7.2363218739  
Au +0.8770659373 +4.4680466614 +7.1922214272  
Au +0.8377836431 +7.3907981606 +7.2397629766  
Au +1.7044997544 +0.0000000000 +4.8211658864  
Au +1.7044997544 +2.9522805041 +4.8211658864  
Au +1.7044997544 +5.9046495776 +4.8211658864  
Au +4.2612749538 +1.4761845367 +4.8211658864  
Au +4.2612749538 +4.4284650409 +4.8211658864  
Au +4.2612749538 +7.3807455450 +4.8211658864  
Au +0.0000000000 +0.0000000000 +2.4105829432  
Au +0.0000000000 +2.9522805041 +2.4105829432

Au +0.0000000000 +5.9046495776 +2.4105829432  
Au +2.5567751994 +1.4761845367 +2.4105829432  
Au +2.5567751994 +4.4284650409 +2.4105829432  
Au +2.5567751994 +7.3807455450 +2.4105829432  
Au +3.4090506443 +0.0000000000 +0.0000000000  
Au +3.4090506443 +2.9522805041 +0.0000000000  
Au +3.4090506443 +5.9046495776 +0.0000000000  
Au +0.8522754450 +1.4761845367 +0.0000000000  
Au +0.8522754450 +4.4284650409 +0.0000000000  
Au +0.8522754450 +7.3807455450 +0.0000000000  
S +4.2436229778 +1.4021406012 +11.4049007589  
S +1.6804200456 +5.7980564240 +11.4167635074  
C +4.1993754262 +0.9384625976 +13.1234145758  
C +5.0977188467 +1.5805191731 +13.9964585335  
C +3.2932236143 +8.8539984379 +13.6439719029  
C +5.0821736535 +1.2872130765 +15.3598143375  
C +3.2930957755 +8.5687698615 +15.0122629725  
C +4.1814779998 +0.3474307963 +15.9123829746  
C +1.6002446889 +5.3145477539 +13.1254520707  
C +0.6442766689 +5.9076520769 +13.9718274832  
C +2.5467526406 +4.4316092510 +13.6771151545  
C +0.6471760520 +5.6263471205 +15.3390771664  
C +2.5440117776 +4.1706486631 +15.0486662160  
C +1.6003571870 +4.7589613869 +15.9228873931  
C +4.1707395440 +0.0552229591 +17.3715915977  
C +3.2208208542 +8.0380626110 +17.9482932308  
C +5.1085544600 +0.6503555190 +18.2473069378  
C +3.2075307367 +7.7755609172 +19.3226515077  
C +5.0943081086 +0.3935754020 +19.6216199369  
C +4.1421650244 +8.3823049125 +20.1718341354  
C +1.6120109684 +4.4801098002 +17.3840882335  
C +0.7707092025 +5.1824643556 +18.2776429740  
C +2.4701516556 +3.5038812527 +17.9417279692  
C +0.7853339567 +4.9213177722 +19.6519106955  
C +2.4925848012 +3.2468265709 +19.3167654111  
C +1.6486239892 +3.9538752994 +20.1833799402  
H +0.6946451404 +2.3159366486 +13.6077497700  
H +2.5873951392 +8.3466203412 +12.9791599316  
H +0.6805624226 +1.8177431884 +15.9969616549  
H +2.5726885682 +7.8284367898 +15.3707262550  
H +5.0102362265 +6.5921422044 +13.5605704420  
H +3.2969820738 +3.9635027824 +13.0324517446  
H +4.9882837546 +6.0958264134 +15.9537667614  
H +3.3143579181 +3.4974599784 +15.4328924906  
H +2.4632330219 +7.5547753642 +17.3262233763  
H +0.7605536915 +1.3297263409 +17.8663406552  
H +2.4545246456 +7.0919033412 +19.7247171826  
H +0.7281184413 +0.8760123836 +20.2590389203

H +4.1288851340 +8.1802606235 +21.2480842586  
H +0.0919058413 +5.9574280239 +17.9121163756  
H +3.1389887071 +2.9237611893 +17.3007320502  
H +0.1139452435 +5.4864607668 +20.3061729707  
H +3.1754176402 +2.4839526122 +19.7035725126  
H +1.6628703406 +3.7525927063 +21.2595847858  
C +1.6161331425 +6.0139345346 +27.1832690776  
C +4.1883772090 +2.0358487379 +25.7617754345  
C +4.1758380168 +1.5854356266 +27.1832325878  
C +1.6036151474 +6.4643207442 +25.7618070737  
C +0.6742598511 +6.4979274829 +28.1187443818  
C +3.2368336251 +1.5649561817 +24.8291560341  
C +2.5552436281 +5.9935399189 +24.8292219858  
C +0.0041212069 +2.0694421772 +28.1187352787  
C +0.6959174459 +6.0891587261 +29.4563101303  
C +3.2411597901 +1.9978335462 +23.4990856126  
C +5.0959487062 +1.6606727600 +29.4563029125  
C +2.5508168244 +6.4263354592 +23.4991208717  
C +4.1983097054 +2.9187971116 +23.0558989757  
C +1.6606962443 +5.1787715721 +29.9061516587  
C +1.5935408367 +7.3471563487 +23.0559117654  
C +4.1311944129 +0.7502457140 +29.9060967321  
C +0.0406810559 +3.3957044802 +23.9610399578  
C +2.5995390412 +4.6796937462 +28.9943360584  
C +0.6375572833 +7.8239864764 +23.9610304624  
C +3.1923345493 +0.2511927884 +28.9942646318  
C +0.0350523422 +2.9593527600 +25.2900163633  
C +2.5761312088 +5.0912475733 +27.6572393135  
C +0.6432381875 +7.3876539100 +25.2900188934  
C +3.2157939333 +0.6627692439 +27.6571786005  
H +2.4687735866 +0.8485318819 +25.1292090783  
H +5.0167649438 +7.2099093673 +27.8159732141  
H +0.7751596141 +2.7814303432 +27.8159593076  
H +3.3234546218 +5.2772935758 +25.1293249926  
H +5.0564440992 +6.4850335773 +30.1445726184  
H +2.4782899349 +1.6177258573 +22.8127783319  
H +3.3137550897 +6.0463560137 +22.8128251723  
H +0.7353740250 +2.0565608388 +30.1446024940  
H +1.6784689303 +4.8576289320 +30.9527732542  
H +4.1950163878 +3.2708302402 +22.0208300000  
H +1.5967387849 +7.6991371088 +22.0208300000  
H +4.1134717093 +0.4290411372 +30.9526990938  
H +0.7989484023 +4.1156733759 +23.6394945589  
H +3.3618095877 +3.9646639651 +29.3172366836  
H +2.4300320730 +8.3931000855 +29.3171316889  
H +4.9927321059 +8.5438439504 +23.6394792744  
H +3.3309840368 +4.6819801964 +26.9815342781  
H +0.8008884040 +3.3536040513 +25.9619282563

H +4.9908738606 +7.7817969124 +25.9619070462  
H +2.4609144684 +0.2535442485 +26.9814759138

**System (8), Au|S|2P|F||2P:**

-----  
x: +5.1135503988 +0.0000000000 +0.0000000000  
y: +0.0000000000 +8.8569300817 +0.0000000000  
z: +0.0000000000 +0.0000000000 +60.0000000000  
-----

Au +0.0739419388 +8.6937854296 +9.6882433263  
Au +0.0970040511 +3.0696436846 +9.5254248390  
Au +4.9557206657 +5.8799475996 +9.6682305979  
Au +2.3941898644 +1.4367180563 +9.6829458394  
Au +2.6508594132 +4.2581551323 +9.7222015759  
Au +2.6347005939 +7.4856470249 +9.5079023822  
Au +3.4309622078 +0.0446920692 +7.1829395056  
Au +3.3956787100 +2.9645473523 +7.2626734756  
Au +3.4217373629 +5.8928698606 +7.2308432764  
Au +0.8669973566 +1.4699758287 +7.2361407633  
Au +0.8767795785 +4.4678340951 +7.1920855942  
Au +0.8368274092 +7.3903730280 +7.2393101999  
Au +1.7044997544 +0.0000000000 +4.8211658864  
Au +1.7044997544 +2.9522805041 +4.8211658864  
Au +1.7044997544 +5.9046495776 +4.8211658864  
Au +4.2612749538 +1.4761845367 +4.8211658864  
Au +4.2612749538 +4.4284650409 +4.8211658864  
Au +4.2612749538 +7.3807455450 +4.8211658864  
Au +0.0000000000 +0.0000000000 +2.4105829432  
Au +0.0000000000 +2.9522805041 +2.4105829432  
Au +0.0000000000 +5.9046495776 +2.4105829432  
Au +2.5567751994 +1.4761845367 +2.4105829432  
Au +2.5567751994 +4.4284650409 +2.4105829432  
Au +2.5567751994 +7.3807455450 +2.4105829432  
Au +3.4090506443 +0.0000000000 +0.0000000000  
Au +3.4090506443 +2.9522805041 +0.0000000000  
Au +3.4090506443 +5.9046495776 +0.0000000000  
Au +0.8522754450 +1.4761845367 +0.0000000000  
Au +0.8522754450 +4.4284650409 +0.0000000000  
Au +0.8522754450 +7.3807455450 +0.0000000000  
S +4.2423292496 +1.4000326519 +11.4075721412  
S +1.6779911091 +5.7960281871 +11.4195707227  
C +4.1975447752 +0.9356992354 +13.1260859581  
C +5.0989818937 +1.5732299196 +13.9993563041  
C +3.2878237050 +8.8554332605 +13.6480921705  
C +5.0825367156 +1.2810486532 +15.3629837741  
C +3.2858754423 +8.5721089241 +15.0167454614  
C +4.1765689914 +0.3472890854 +15.9174540732  
C +1.5936891173 +5.3094461622 +13.1272631774

C +0.6407738869 +5.9058806909 +13.9748158091  
C +2.5357789614 +4.4218931987 +13.6791073718  
C +0.6438726985 +5.6255145691 +15.3422918807  
C +2.5327210583 +4.1609060400 +15.0506131557  
C +1.5937453663 +4.7546037773 +15.9266907171  
C +4.1641481775 +0.0543195522 +17.3760288090  
C +3.2215316377 +8.0240863753 +17.9460746252  
C +5.0924979118 +0.6584507531 +18.2572680243  
C +3.2050557783 +7.7431799809 +19.3164031897  
C +5.0922882562 +0.3979064409 +19.6317621341  
C +4.1459695059 +8.3646707647 +20.1318086785  
C +1.6064065171 +4.4765050296 +17.3876198915  
C +0.7517941796 +5.1653173390 +18.2807671330  
C +2.4799492182 +3.5136150189 +17.9458029592  
C +0.7560077452 +4.9098569047 +19.6567101281  
C +2.5064885448 +3.2448337617 +19.3181690187  
C +1.6371236144 +3.9490659863 +20.1459805880  
H +0.7000910715 +2.3043340701 +13.6102853193  
H +2.5798986743 +8.3497734083 +12.9841404748  
H +0.6867804999 +1.8069643045 +15.9975049869  
H +2.5608251313 +7.8356906156 +15.3738504140  
H +5.0087686375 +6.5930810390 +13.5643284882  
H +3.2831652606 +3.9492519819 +13.0343534065  
H +4.9871792277 +6.1002105938 +15.9558042564  
H +3.2991860140 +3.4813669364 +15.4315341606  
H +2.4696965496 +7.5359278170 +17.3212881107  
H +0.7344950386 +1.3515143889 +17.8810558967  
H +2.4723300281 +7.0558910635 +19.7459976857  
H +0.7020649020 +0.8680854312 +20.3033204777  
H +0.0612705609 +5.9287492843 +17.9136105386  
H +3.1623627460 +2.9468954906 +17.3077500885  
H +0.0905098421 +5.4432743758 +20.3409914959  
H +3.1889992300 +2.5013830506 +19.7380740941  
F +4.1445837337 +8.0751465773 +21.4949833719  
F +1.6458780126 +3.6751831374 +21.5115097200  
C +1.6161331425 +5.8639345346 +28.0532690776  
C +4.1883772090 +1.8858487379 +26.6317754345  
C +4.1758380168 +1.4354356266 +28.0532325878  
C +1.6036151474 +6.3143207442 +26.6318070737  
C +0.6742598511 +6.3479274829 +28.9887443818  
C +3.2368336251 +1.4149561817 +25.6991560341  
C +2.5552436281 +5.8435399189 +25.6992219858  
C +0.0041212069 +1.9194421772 +28.9887352787  
C +0.6959174459 +5.9391587261 +30.3263101303  
C +3.2411597901 +1.8478335462 +24.3690856126  
C +5.0959487062 +1.5106727600 +30.3263029125  
C +2.5508168244 +6.2763354592 +24.3691208717  
C +4.1983097054 +2.7687971116 +23.9258989757

C +1.6606962443 +5.0287715721 +30.7761516587  
C +1.5935408367 +7.1971563487 +23.9259117654  
C +4.1311944129 +0.6002457140 +30.7760967321  
C +0.0406810559 +3.2457044802 +24.8310399578  
C +2.5995390412 +4.5296937462 +29.8643360584  
C +0.6375572833 +7.6739864764 +24.8310304624  
C +3.1923345493 +0.1011927884 +29.8642646318  
C +0.0350523422 +2.8093527600 +26.1600163633  
C +2.5761312088 +4.9412475733 +28.5272393135  
C +0.6432381875 +7.2376539100 +26.1600188934  
C +3.2157939333 +0.5127692439 +28.5271786005  
H +2.4687735866 +0.6985318819 +25.9992090783  
H +5.0167649438 +7.0599093673 +28.6859732141  
H +0.7751596141 +2.6314303432 +28.6859593076  
H +3.3234546218 +5.1272935758 +25.9993249926  
H +5.0564440992 +6.3350335773 +31.0145726184  
H +2.4782899349 +1.4677258573 +23.6827783319  
H +3.3137550897 +5.8963560137 +23.6828251723  
H +0.7353740250 +1.9065608388 +31.0146024940  
H +1.6784689303 +4.7076289320 +31.8227732542  
H +4.1950163878 +3.1208302402 +22.8908300000  
H +1.5967387849 +7.5491371088 +22.8908300000  
H +4.1134717093 +0.2790411372 +31.8226990938  
H +0.7989484023 +3.9656733759 +24.5094945589  
H +3.3618095877 +3.8146639651 +30.1872366836  
H +2.4300320730 +8.2431000855 +30.1871316889  
H +4.9927321059 +8.3938439504 +24.5094792744  
H +3.3309840368 +4.5319801964 +27.8515342781  
H +0.8008884040 +3.2036040513 +26.8319282563  
H +4.9908738606 +7.6317969124 +26.8319070462  
H +2.4609144684 +0.1035442485 +27.8514759138

**System (9), AulPyrI2PICNI2P:**

-----  
x: +5.1135503988 +0.0000000000 +0.0000000000  
y: +0.0000000000 +8.8569290977 +0.0000000000  
z: +0.0000000000 +0.0000000000 +60.0000000000  
-----

Au +5.0852786949 +8.8220062445 +9.5908205042  
Au +5.1111917601 +2.9202974354 +9.6018225200  
Au +5.0898780164 +5.8793693087 +9.7347946764  
Au +2.5508449729 +1.4515185512 +9.7353122193  
Au +2.5552765377 +4.3943127440 +9.5963650838  
Au +2.5292200145 +7.3456320795 +9.5977661576  
Au +3.3859507809 -0.0005699906 +7.2139409371  
Au +3.3950985616 +2.9167734991 +7.2151661451  
Au +3.4213944870 +5.8869114955 +7.2142317555  
Au +0.8640365671 +1.4586123199 +7.2174903456

Au +0.8373175481 +4.4283511744 +7.2183240176  
Au +0.8325734473 +7.3461859213 +7.2130019775  
Au +1.7044997544 +0.0000000000 +4.8211660106  
Au +1.7044997544 +2.9522801761 +4.8211660106  
Au +1.7044997544 +5.9046489216 +4.8211660106  
Au +4.2612749538 +1.4761843727 +4.8211660106  
Au +4.2612749538 +4.4284645489 +4.8211660106  
Au +4.2612749538 +7.3807447250 +4.8211660106  
Au +0.0000000000 +0.0000000000 +2.4105830053  
Au +0.0000000000 +2.9522801761 +2.4105830053  
Au +0.0000000000 +5.9046489216 +2.4105830053  
Au +2.5567751994 +1.4761843727 +2.4105830053  
Au +2.5567751994 +4.4284645489 +2.4105830053  
Au +2.5567751994 +7.3807447250 +2.4105830053  
Au +3.4090506443 +0.0000000000 +0.0000000000  
Au +3.4090506443 +2.9522801761 +0.0000000000  
Au +3.4090506443 +5.9046489216 +0.0000000000  
Au +0.8522754450 +1.4761843727 +0.0000000000  
Au +0.8522754450 +4.4284645489 +0.0000000000  
Au +0.8522754450 +7.3807447250 +0.0000000000  
N +2.4945935124 +1.2793008131 +12.3058984871  
N +5.1101897960 +5.7220842256 +12.3156195310  
C +3.3630891316 +1.9078716925 +13.1389968214  
C +1.6243156045 +0.4018765315 +12.8688203336  
C +3.3878800295 +1.6908380514 +14.5193146487  
C +1.5931343994 +0.1316330984 +14.2360776065  
C +2.4882263692 +0.7784650133 +15.1189385717  
C +4.1934638518 +6.3094668263 +13.1269920755  
C +0.8920804362 +4.8850595518 +12.8999186234  
C +4.1415095312 +6.0874334559 +14.5058481711  
C +0.9035977774 +4.6182585086 +14.2682455945  
C +5.0682368948 +5.2180915435 +15.1275736698  
C +2.4771884732 +0.5095629531 +16.5776896424  
C +1.5515309847 +8.4598137881 +17.1475052903  
C +3.3830494637 +1.1439582059 +17.4613935260  
C +1.5330660620 +8.1935197530 +18.5144297850  
C +3.3744151336 +0.8887156411 +18.8329313894  
C +5.0545360273 +4.9448933411 +16.5855306784  
C +4.1788097149 +5.6241791554 +17.4660235961  
C +2.4488293058 +8.8305474066 +19.3795944580  
C +5.0476301596 +4.4066858185 +19.3863771927  
C +2.4436541193 +8.5207967063 +20.7729865476  
C +5.0375407404 +4.1017980226 +20.7808887152  
C +0.8144205059 +3.9887551117 +17.1565497991  
C +4.1693121288 +5.3658960397 +18.8372989497  
C +0.8179603203 +3.7228958689 +18.5237576056  
H +4.0603068819 +2.6053255371 +12.6597933918  
H +0.9380512216 +8.7597694850 +12.1708441894



H +4.1217614499 +2.2412468846 +15.1133817228  
H +0.8588037736 +8.2626428576 +14.5927439191  
H +3.4773906649 +6.9746923541 +12.6299199627  
H +1.6173040808 +4.4192132653 +12.2188912317  
H +3.3612296576 +6.5932646837 +15.0800059342  
H +1.6693783190 +3.9374170136 +14.6462462410  
H +0.8209892337 +7.9447240692 +16.5195117448  
H +4.1202020716 +1.8558048349 +17.0821296547  
H +0.8082489869 +7.4863217579 +18.9254089025  
H +4.0851978478 +1.3900496831 +19.4956273688  
H +3.4869223453 +6.3803446339 +17.0857971191  
H +1.5103092057 +3.4283550628 +16.5278559086  
H +3.4842231192 +5.9032677475 +19.4989236572  
H +1.5042236532 +2.9784059876 +18.9359798177  
N +2.4355256898 +8.2146939937 +21.9242047953  
N +5.0333527990 +3.8013883313 +21.9335773417  
C +5.0417089759 +6.0051562750 +28.6536538478  
C +2.5004026436 +2.0270704783 +27.2321602047  
C +2.4878634514 +1.5766573670 +28.6536173580  
C +5.0291909808 +6.4555424846 +27.2321918439  
C +4.0998356845 +6.4891492233 +29.5891291520  
C +1.5488590597 +1.5561779221 +26.2995408043  
C +0.8672690627 +5.9847616593 +26.2996067560  
C +3.4296970403 +2.0606639176 +29.5891200489  
C +4.1214932793 +6.0803804665 +30.9266949005  
C +1.5531852247 +1.9890552866 +24.9694703828  
C +3.4079741408 +1.6518945004 +30.9266876827  
C +0.8628422590 +6.4175571996 +24.9695056419  
C +2.5103351400 +2.9100188520 +24.5262837459  
C +5.0862720777 +5.1699933125 +31.3765364289  
C +5.0191166701 +7.3383780891 +24.5262965356  
C +2.4432198475 +0.7414674544 +31.3764815023  
C +3.4662568893 +3.3869262206 +25.4314247280  
C +0.9115644758 +4.6709154866 +30.4647208286  
C +4.0631331167 +7.8152082168 +25.4314152326  
C +1.5043599839 +0.2424145288 +30.4646494020  
C +3.4606281756 +2.9505745004 +26.7604011335  
C +0.8881566434 +5.0824693137 +29.1276240837  
C +4.0688140209 +7.3788756504 +26.7604036636  
C +1.5278193679 +0.6539909843 +29.1275633707  
H +0.7807990212 +0.8397536223 +26.5995938485  
H +3.3287903784 +7.2011311077 +29.2863579843  
H +4.2007354475 +2.7726520836 +29.2863440778  
H +1.6354800564 +5.2685153162 +26.5997097628  
H +3.3684695338 +6.4762553177 +31.6149573886  
H +0.7903153695 +1.6089475977 +24.2831631021  
H +1.6257805243 +6.0375777541 +24.2832099425  
H +4.1609498584 +2.0477825792 +31.6149872642

H +5.1040447637 +4.8488506724 +32.4231580244  
H +2.5070418224 +3.2620519806 +23.4912147702  
H +5.0223146183 +7.6903588492 +23.4912147702  
H +2.4254971439 +0.4202628776 +32.4230838640  
H +4.2245242357 +4.1068951163 +25.1098793291  
H +1.6738350223 +3.9558857055 +30.7876214538  
H +0.7420575076 -0.4726072718 +30.7875164591  
H +3.3047575405 -0.3218634069 +25.1098640446  
H +1.6430094714 +4.6732019368 +28.4519190483  
H +4.2264642374 +3.3448257917 +27.4323130265  
H +3.3028992952 +7.7730186528 +27.4322918164  
H +0.7729399030 +0.2447659889 +28.4518606840

**System (10), Au|CN|2P|CN||2P:**

-----  
x: +5.1135503988 +0.0000000000 +0.0000000000  
y: +0.0000000000 +8.8569300817 +0.0000000000  
z: +0.0000000000 +0.0000000000 +60.0000000000  
-----

Au +0.0073511838 +8.7059910454 +9.6849823366  
Au +5.0566627199 +2.9177047681 +9.7489604034  
Au +4.9808468370 +5.7845466555 +9.6991911797  
Au +2.4253686941 +1.4097371958 +9.7208000650  
Au +2.4936734221 +4.2826936271 +9.6738288178  
Au +2.5734127134 +7.3653567203 +9.7569426374  
Au +3.3685130273 +8.7937016993 +7.2455307755  
Au +3.3836973400 +2.8967725725 +7.2178756400  
Au +3.3788861837 +5.8548413339 +7.2346104493  
Au +0.8273754791 +1.4273121139 +7.2352206963  
Au +0.8151449673 +4.3679250016 +7.2213615028  
Au +0.8205444665 +7.3309639530 +7.2324031899  
Au +1.7044997544 +0.0000000000 +4.8211658864  
Au +1.7044997544 +2.9522805041 +4.8211658864  
Au +1.7044997544 +5.9046495776 +4.8211658864  
Au +4.2612749538 +1.4761845367 +4.8211658864  
Au +4.2612749538 +4.4284650409 +4.8211658864  
Au +4.2612749538 +7.3807455450 +4.8211658864  
Au +0.0000000000 +0.0000000000 +2.4105829432  
Au +0.0000000000 +2.9522805041 +2.4105829432  
Au +0.0000000000 +5.9046495776 +2.4105829432  
Au +2.5567751994 +1.4761845367 +2.4105829432  
Au +2.5567751994 +4.4284650409 +2.4105829432  
Au +2.5567751994 +7.3807455450 +2.4105829432  
Au +3.4090506443 +0.0000000000 +0.0000000000  
Au +3.4090506443 +2.9522805041 +0.0000000000  
Au +3.4090506443 +5.9046495776 +0.0000000000  
Au +0.8522754450 +1.4761845367 +0.0000000000  
Au +0.8522754450 +4.4284650409 +0.0000000000

Au +0.8522754450 +7.3807455450 +0.0000000000  
N +4.2102833224 +1.2656815645 +12.3135252512  
N +1.5873288986 +5.8410344579 +12.3071355008  
C +4.1987075949 +1.3049228775 +11.0806476676  
C +1.6208972125 +5.9216360632 +11.0767982324  
C +4.1565458392 +1.0065776775 +13.6506474735  
C +5.0377970968 +1.6599676356 +14.5441073898  
C +3.2248878536 +0.0767083002 +14.1747254272  
C +4.9926526635 +1.3757050839 +15.9059247669  
C +3.1984063084 +8.6657721699 +15.5406239704  
C +4.0797990392 +0.4406418087 +16.4531540784  
C +1.5549444810 +5.5112596687 +13.6290195398  
C +0.6041617805 +6.1045836570 +14.4929446831  
C +2.4778893153 +4.5833260564 +14.1704374483  
C +0.5891796017 +5.7824188277 +15.8467461198  
C +2.4483815238 +4.2828202499 +15.5292060291  
C +1.5127469980 +4.8715846720 +16.4161230416  
C +4.0556115227 +0.1335234355 +17.9043228464  
C +3.1141509792 +8.0883174890 +18.4559936862  
C +4.9756682063 +0.7244622315 +18.8046449545  
C +3.0966548092 +7.7851507089 +19.8161644740  
C +4.9674885962 +0.4332584006 +20.1685055541  
C +1.5055711370 +4.5547635667 +17.8650631940  
C +0.6140596926 +5.1897548923 +18.7643382069  
C +2.4007565584 +3.6071633539 +18.4175967071  
C +0.6106256498 +4.9006737960 +20.1291365130  
C +2.4101645980 +3.3103092987 +19.7790085713  
C +4.0280292259 +8.3784068065 +20.6945557397  
C +1.5112989121 +3.9516735956 +20.6575977512  
C +4.0304399854 +8.0290399639 +22.0787869939  
C +1.5063480432 +3.6157355233 +22.0452306352  
H +0.6467066572 +2.3815852142 +14.1544419129  
H +2.5330563173 +8.4292732549 +13.4949741966  
H +0.5857479373 +1.9005197379 +16.5533406741  
H +2.4660544175 +7.9343030629 +15.8914676784  
H +4.9912680480 +6.8125784035 +14.0865912966  
H +3.2162631429 +4.1168127899 +13.5131275286  
H +4.9389984512 +6.2559409151 +16.4684099842  
H +3.1890216627 +3.5688984542 +15.8974514359  
H +2.3672522669 +7.6066859460 +17.8203533785  
H +0.6160864103 +1.4288870855 +18.4462097601  
H +2.3587525751 +7.0820898357 +20.2108751371  
H +0.5782535369 +0.9023103554 +20.8403782385  
H +5.0131864602 +5.9350921995 +18.4062234832  
H +3.1149801514 +3.0805296158 +17.7801505670  
H +5.0247850181 +5.4060988356 +20.8010408785  
H +3.1162364552 +2.5750258906 +20.1738356874  
N +4.0365170011 +7.6919821184 +23.2212051545

N +1.5032664385 +3.2904649406 +23.1911099526  
C +1.5291495771 +5.4624442750 +29.9206548478  
C +4.1013936436 +1.4843584783 +28.4991612047  
C +4.0888544514 +1.0339453670 +29.9206183580  
C +1.5166315820 +5.9128304846 +28.4991928439  
C +0.5872762857 +5.9464372233 +30.8561301520  
C +3.1498500597 +1.0134659221 +27.5665418043  
C +2.4682600627 +5.4420496593 +27.5666077560  
C -0.0828623585 +1.5179519176 +30.8561210489  
C +0.6089338805 +5.5376684665 +32.1936959005  
C +3.1541762247 +1.4463432866 +26.2364713828  
C +5.0089651408 +1.1091825004 +32.1936886827  
C +2.4638332590 +5.8748451996 +26.2365066419  
C +4.1113261400 +2.3673068520 +25.7932847459  
C +1.5737126789 +4.6272813125 +32.6435374289  
C +1.5065572713 +6.7956660891 +25.7932975356  
C +4.0442108475 +0.1987554544 +32.6434825023  
C -0.0463025095 +2.8442142206 +26.6984257280  
C +2.5125554758 +4.1282034866 +31.7317218286  
C +0.5505737179 +7.2724962168 +26.6984162326  
C +3.1053509839 -0.3002974712 +31.7316504020  
C -0.0519312232 +2.4078625004 +28.0274021335  
C +2.4891476434 +4.5397573137 +30.3946250837  
C +0.5562546221 +6.8361636504 +28.0274046636  
C +3.1288103679 +0.1112789843 +30.3945643707  
H +2.3817900212 +0.2970416223 +27.8665948485  
H +4.9297813784 +6.6584191077 +30.5533589843  
H +0.6881760487 +2.2299400836 +30.5533450778  
H +3.2364710564 +4.7258033162 +27.8667107628  
H +4.9694605338 +5.9335433177 +32.8819583886  
H +2.3913063695 +1.0662355977 +25.5501641021  
H +3.2267715243 +5.4948657541 +25.5502109425  
H +0.6483904596 +1.5050705792 +32.8819882642  
H +1.5914853649 +4.3061386724 +33.6901590244  
H +4.1080328224 +2.7193399806 +24.7582157702  
H +1.5097552195 +7.1476468492 +24.7582157702  
H +4.0264881439 -0.1224491224 +33.6900848640  
H +0.7119648369 +3.5641831163 +26.3768803291  
H +3.2748260223 +3.4131737055 +32.0546224538  
H +2.3430485076 +7.8416098259 +32.0545174591  
H +4.9057485405 +7.9923536908 +26.3768650446  
H +3.2440004714 +4.1304899368 +29.7189200483  
H +0.7139048386 +2.8021137917 +28.6993140265  
H +4.9038902952 +7.2303066528 +28.6992928164  
H +2.3739309030 -0.2979460111 +29.7188616840

**System (11), Au|S|2P|CN||2P:**

-----

x: +5.1135503988 +0.0000000000 +0.0000000000  
y: +0.0000000000 +8.8569300817 +0.0000000000  
z: +0.0000000000 +0.0000000000 +60.0000000000

-----  
Au +0.0723107162 +8.6948748320 +9.6889224913  
Au +0.0969171207 +3.0692805505 +9.5262851147  
Au +4.9558280503 +5.8805144431 +9.6694983726  
Au +2.3951256442 +1.4361600697 +9.6844852800  
Au +2.6505986221 +4.2587219758 +9.7255521232  
Au +2.6327318770 +7.4842564869 +9.5081740482  
Au +3.4306656219 +0.0450197756 +7.1832111716  
Au +3.3953003073 +2.9651407666 +7.2641676386  
Au +3.4216197512 +5.8927635774 +7.2313866083  
Au +0.8670945140 +1.4703832475 +7.2365482623  
Au +0.8767284430 +4.4681352307 +7.1927647592  
Au +0.8361473070 +7.3908424453 +7.2394007552  
Au +1.7044997544 +0.0000000000 +4.8211658864  
Au +1.7044997544 +2.9522805041 +4.8211658864  
Au +1.7044997544 +5.9046495776 +4.8211658864  
Au +4.2612749538 +1.4761845367 +4.8211658864  
Au +4.2612749538 +4.4284650409 +4.8211658864  
Au +4.2612749538 +7.3807455450 +4.8211658864  
Au +0.0000000000 +0.0000000000 +2.4105829432  
Au +0.0000000000 +2.9522805041 +2.4105829432  
Au +0.0000000000 +5.9046495776 +2.4105829432  
Au +2.5567751994 +1.4761845367 +2.4105829432  
Au +2.5567751994 +4.4284650409 +2.4105829432  
Au +2.5567751994 +7.3807455450 +2.4105829432  
Au +3.4090506443 +0.0000000000 +0.0000000000  
Au +3.4090506443 +2.9522805041 +0.0000000000  
Au +3.4090506443 +5.9046495776 +0.0000000000  
Au +0.8522754450 +1.4761845367 +0.0000000000  
Au +0.8522754450 +4.4284650409 +0.0000000000  
Au +0.8522754450 +7.3807455450 +0.0000000000  
S +4.2431780989 +1.4000592227 +11.4119187971  
S +1.6746417336 +5.7937696699 +11.4253662640  
C +4.1993294043 +0.9346984023 +13.1299345597  
C +5.1054096265 +1.5674817720 +14.0024804631  
C +3.2844334211 +0.0023382295 +13.6523029935  
C +5.0882076430 +1.2761419139 +15.3661079331  
C +3.2804653060 +8.5779722119 +15.0210015621  
C +4.1752445819 +0.3491224700 +15.9213026748  
C +1.5873585419 +5.3071610743 +13.1326059420  
C +0.6369898596 +5.9079089278 +13.9807019057  
C +2.5264518455 +4.4156756338 +13.6839068044  
C +0.6411574032 +5.6298101802 +15.3484949210  
C +2.5233530340 +4.1553616018 +15.0551409223  
C +1.5884988636 +4.7551617638 +15.9324409807

C +4.1582675946 +0.0596159964 +17.3784285253  
C +3.2147357292 +8.0286654082 +17.9467990678  
C +5.0809310608 +0.6653768724 +18.2655991149  
C +3.1952582157 +7.7545611360 +19.3135506968  
C +5.0713431538 +0.4032825974 +19.6355201804  
C +4.1269880068 +8.3644227707 +20.1799841153  
C +1.6038037200 +4.4791886794 +17.3920118251  
C +0.7395421129 +5.1535021943 +18.2881021149  
C +2.4914393659 +3.5297169177 +17.9520059994  
C +0.7489561592 +4.8932058761 +19.6591098445  
C +2.5161173602 +3.2636990227 +19.3199348477  
C +1.6389133570 +3.9384465272 +20.1953332441  
C +4.1233727266 +8.0493729107 +21.5727251246  
C +1.6446916690 +3.6299685093 +21.5895684163  
H +0.7100982897 +2.2943877377 +13.6122775366  
H +2.5737521867 +8.3572929419 +12.9885324084  
H +0.6959081873 +1.7960525666 +16.0015346991  
H +2.5505417814 +7.8476828989 +15.3803251202  
H +5.0073930925 +6.5975980733 +13.5699429188  
H +3.2710256920 +3.9395447865 +13.0384736741  
H +4.9896490726 +6.1096697951 +15.9644070129  
H +3.2855328345 +3.4712346084 +15.4361072049  
H +2.4668227343 +7.5372563565 +17.3196581147  
H +0.7233628394 +1.3602916066 +17.8930544782  
H +2.4547240741 +7.0626666150 +19.7225891323  
H +0.6841009994 +0.8840013345 +20.2969363268  
H +0.0375692548 +5.9072180873 +17.9221227398  
H +3.1850362285 +2.9747948204 +17.3155378471  
H +0.0682812385 +5.4256048002 +20.3295815241  
H +3.2154720804 +2.5256156113 +19.7218194120  
N +4.1235005654 +7.7434722596 +22.7238192298  
N +1.6496722670 +3.3281686168 +22.7417039079  
C +1.6161331425 +5.5139345346 +29.5032690776  
C +4.1883772090 +1.5358487379 +28.0817754345  
C +4.1758380168 +1.0854356266 +29.5032325878  
C +1.6036151474 +5.9643207442 +28.0818070737  
C +0.6742598511 +5.9979274829 +30.4387443818  
C +3.2368336251 +1.0649561817 +27.1491560341  
C +2.5552436281 +5.4935399189 +27.1492219858  
C +0.0041212069 +1.5694421772 +30.4387352787  
C +0.6959174459 +5.5891587261 +31.7763101303  
C +3.2411597901 +1.4978335462 +25.8190856126  
C +5.0959487062 +1.1606727600 +31.7763029125  
C +2.5508168244 +5.9263354592 +25.8191208717  
C +4.1983097054 +2.4187971116 +25.3758989757  
C +1.6606962443 +4.6787715721 +32.2261516587  
C +1.5935408367 +6.8471563487 +25.3759117654  
C +4.1311944129 +0.2502457140 +32.2260967321

C +0.0406810559 +2.8957044802 +26.2810399578  
C +2.5995390412 +4.1796937462 +31.3143360584  
C +0.6375572833 +7.3239864764 +26.2810304624  
C +3.1923345493 -0.2488072116 +31.3142646318  
C +0.0350523422 +2.4593527600 +27.6100163633  
C +2.5761312088 +4.5912475733 +29.9772393135  
C +0.6432381875 +6.8876539100 +27.6100188934  
C +3.2157939333 +0.1627692439 +29.9771786005  
H +2.4687735866 +0.3485318819 +27.4492090783  
H +5.0167649438 +6.7099093673 +30.1359732141  
H +0.7751596141 +2.2814303432 +30.1359593076  
H +3.3234546218 +4.7772935758 +27.4493249926  
H +5.0564440992 +5.9850335773 +32.4645726184  
H +2.4782899349 +1.1177258573 +25.1327783319  
H +3.3137550897 +5.5463560137 +25.1328251723  
H +0.7353740250 +1.5565608388 +32.4646024940  
H +1.6784689303 +4.3576289320 +33.2727732542  
H +4.1950163878 +2.7708302402 +24.3408300000  
H +1.5967387849 +7.1991371088 +24.3408300000  
H +4.1134717093 -0.0709588628 +33.2726990938  
H +0.7989484023 +3.6156733759 +25.9594945589  
H +3.3618095877 +3.4646639651 +31.6372366836  
H +2.4300320730 +7.8931000855 +31.6371316889  
H +4.9927321059 +8.0438439504 +25.9594792744  
H +3.3309840368 +4.1819801964 +29.3015342781  
H +0.8008884040 +2.8536040513 +28.2819282563  
H +4.9908738606 +7.2817969124 +28.2819070462  
H +2.4609144684 -0.2464557515 +29.3014759138
